# Supplementary material for: Synthesis and characterization of manganese-doped CdS nanoparticles
Source: Royal Society of Chemistry journal article supplement (doi:10.1039/b300343d), 2003-03-06
Supplement: b300343d-esi.pdf [file b300343d-esi.pdf]

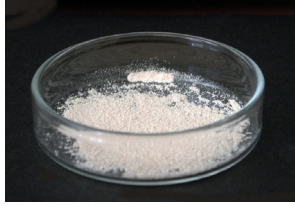

(a)

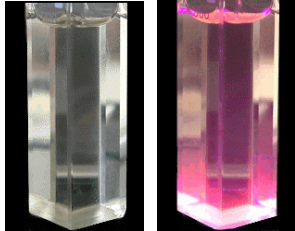

(b)

(c)

### **Optical properties of Cd(Mn)S nanoparticles**

demonstrated by photographs made under daylight (a,b) and under UV lamp with excitation wavelength of 365 nm (c).

Picture (a): Cd(Mn)S powder doped with 1 at% manganese.

Picture (b): Colloidal solution of (a).

Picture (c): Emission of red light due to intra-3d-orbital transitions of  $Mn^{2+}$  ions.
